# Supplementary material
Source: Research Square preprint supplement (doi:10.21203/rs.3.rs-8785156/v1)
Supplement: Supplementary file 1 [file dbae23f469fb063fec52f353.docx]

**Supplementary Table 1**. Descriptive statistics and bivariate analysis comparing participants who were included and those who were excluded due to missing follow-up information.

| **Variables** | | Included  N= 32,325 | Excluded  N=23,015 | Test | *p*. value |
| --- | --- | --- | --- | --- | --- |
| Gender-T1 (%) | Female | 60.2% | 39.8% | χ2=91.21 | <0.001 |
| Male | 56.2% | 43.8% |
| Age –T1 | Mean (SD) | 64.6 (9.1) | 66.3 (10.7) | t=19.3 | <0.001 |
| Number of chronic diseases – T1 | Mean (SD) | 1.7 (1.4) | 1.8 (1.5) | t=8.3 | <0.001 |
| ADL – T1 | Mean (SD) | 0.16 (0.6) | 0.34 (1.0) | t=-23.0 | <0.001 |
| Physical activity – T1 | Never participate in vigorous or moderate physical activity | 44.4% | 55.6% | χ2=620.77 | <0.001 |
| Active | 60.5% | 39.5% |
| Depression – T1 | Mean (SD) | 2.5 (2.1) | 2.7 (2.3) | t=12.0 | <0.001 |
| Loneliness – T1 | Mean (SD) | 3.8 (1.28) | 3.9 (1.40) | t= 5.37 | <0.001 |
| CR – T1 | Mean (SD) | 0.04 (1.2) | -0.06 (1.2) | t=10.0 | <0.001 |
| Cognitive performance – T1 | Mean (SD) | 0.07 (0.7) | -0.15 (0.8) | t=-32.2 | <0.001 |

*Notes*: ADL (activities of daily living), T1 (Time1, baseline) , T2 (follow up, outcome)
